# Supplementary material for: Acidogenic fermentation of dairy by-products for the utilization of volatile fatty acids IN PHBV production by Haloferax mediterranei
Source: Royal Society of Chemistry journal article supplement (doi:10.1039/d4fb00279b), 2024-12-05

## SUPPLEMENTARY INFORMATION

### ACIDOGENIC FERMENTATION OF DAIRY BY-PRODUCTS FOR THE UTILIZATION OF VOLATILE FATTY ACIDS IN PHBV PRODUCTION BY *HALOFERAX MEDITERRANEI*

Leire Urbina<sup>1,\*</sup>, Eric Rovira-Cal<sup>2,3</sup>, Ibai Nafarrate<sup>1</sup>, Ana Urkiaga<sup>1</sup>, Josu Berganza<sup>1</sup>, Enrike Aymerich<sup>2,3</sup>, Mari Jose Suárez<sup>1,\*</sup>

<sup>1</sup>Gaiker Technology Centre, Basque Research and Technology Alliance (BRTA), Parque Tecnológico de Bizkaia, Edificio 202, 48170 Zamudio, Spain

<sup>2</sup>CEIT-Basque Research and Technology Alliance (BRTA), Paseo Manuel Lardizabal 15, 20018 Donostia - San Sebastián, Spain.

<sup>3</sup>Universidad de Navarra, Tecnun, Paseo Manuel Lardizabal 13, 20018 Donostia - San Sebastián, Spain.

([urbina@gaiker.es](mailto:urbina@gaiker.es), [nafarrate@gaiker.es](mailto:nafarrate@gaiker.es), [eroviracal@ceit.es](mailto:eroviracal@ceit.es), [urkiaga@gaiker.es](mailto:urkiaga@gaiker.es), [eymerich@ceit.es](mailto:eymerich@ceit.es), [berganza@gaiker.es](mailto:berganza@gaiker.es), [suarez@gaiker.es](mailto:suarez@gaiker.es))

(\*Corresponding authors: [urbina@gaiker.es](mailto:urbina@gaiker.es); [suarez@gaiker.es](mailto:suarez@gaiker.es))

Data corresponding to **Figure 1** of the manuscript

| Mesophilic fermentation |         |         |         |         |         |         |         |         |          |
|-------------------------|---------|---------|---------|---------|---------|---------|---------|---------|----------|
|                         | Hac     | Hpro    | IsoHBu  | Hbu     | IsoHVa  | Hva     | Hcap    | TVFA    | Sugars   |
| Time (days)             | mgCOD/L | mg COD/L |
| 0                       | 0       | 0       | 0       | 0       | 0       | 0       | 0       | 0       | 5125,55  |
| 1                       | 302,95  | 138,43  | 0,00    | 172,56  | 0,00    | 0,00    | 0,00    | 613,94  | 1699,31  |
| 2                       | 1147,31 | 1536,01 | 0,00    | 259,74  | 17,26   | 0,00    | 0,00    | 2960,33 | 133,42   |
| 3                       | 1296,27 | 1689,49 | 6,01    | 305,26  | 42,74   | 39,05   | 0,00    | 3378,82 | 103,61   |
| 4                       | 1348,14 | 1675,56 | 7,36    | 314,32  | 43,73   | 61,22   | 0,00    | 3450,33 | 97,79    |
| 7                       | 1490,89 | 1674,75 | 12,66   | 329,68  | 71,44   | 214,94  | 35,13   | 3829,49 | 94,88    |
| 8                       | 1383,40 | 1636,24 | 18,12   | 316,10  | 77,51   | 205,28  | 40,60   | 3677,26 | 83,25    |
| 9                       | 1223,91 | 1508,07 | 11,45   | 296,95  | 83,44   | 201,36  | 35,02   | 3360,20 | 106,88   |

| Thermophilic fermentation |         |         |         |         |         |         |         |         |          |
|---------------------------|---------|---------|---------|---------|---------|---------|---------|---------|----------|
|                           | Hac     | Hpro    | IsoHBu  | Hbu     | IsoHVa  | Hva     | Hcap    | TVFA    | Sugars   |
| Time (days)               | mgCOD/L | mg COD/L |
| 0                         | 0       | 0       | 0       | 0       | 0       | 0       | 0       | 0       | 4126,27  |
| 1                         | 279,20  | 16,42   | 1,80    | 394,37  | 37,48   | 0,00    | 0,00    | 729,26  | 2508,00  |
| 2                         | 256,67  | 462,57  | 16,78   | 2025,41 | 46,92   | 0,00    | 0,00    | 2808,35 | 129,69   |
| 3                         | 304,03  | 432,08  | 13,14   | 1908,87 | 69,33   | 0,00    | 0,00    | 2727,45 | 127,34   |
| 7                         | 360,83  | 435,07  | 16,20   | 1836,00 | 89,06   | 0,00    | 0,00    | 2737,16 | 155,91   |
| 8                         | 782,19  | 495,08  | 28,76   | 2047,73 | 129,13  | 0,00    | 0,00    | 3482,90 | 122,97   |
| 9                         | 778,26  | 497,73  | 27,86   | 2059,34 | 122,48  | 0,00    | 0,00    | 3485,67 | 129,02   |

Data corresponding to **Figure 2** of the manuscript

| Concentration  | WAF1              |                  | WAF2            |                   | WAF3            |                   |
|----------------|-------------------|------------------|-----------------|-------------------|-----------------|-------------------|
|                | 100%              | 50%              | 100%            | 50%               | 100%            | 50%               |
| PHBV (g/L) (1) | 0.2012<br>± 0.009 | 0.1068<br>±0.002 | 0.6424<br>±0.01 | 0.3078<br>±0.0045 | 0.6026<br>±0.01 | 0.6204<br>±0.0015 |
| OD (625nm)     | 7.1±0.3           | 2.7±0.05         | 7.6±0.38        | 4.5±0.09          | 8.0±0.25        | 8.3±0.38          |
| Reinoculation  |                   |                  |                 |                   |                 |                   |
| PHBV (g/L) (R) | 0.296<br>±0.004   | 0.1304<br>±0.01  | 0.8182<br>±0.01 | 0.4058<br>±0.03   | 1.3922<br>±0.01 | 0.8242<br>±0.025  |
| OD (625nm)     | 10.8±0.21         | 4.9±0.09         | 13.0±0.65       | 7.2±0.2           | 18±0.9          | 17±0.8            |

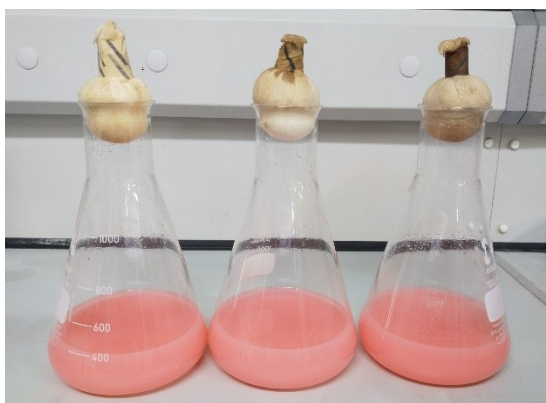

Figure S1. *H. mediterranei* fermentations in shake flask experiments.

Data corresponding to **Figure 3** of the manuscript

| Concentration  | WAF1            |                 | WAF2            |                 | WAF3            |                  |
|----------------|-----------------|-----------------|-----------------|-----------------|-----------------|------------------|
|                | 100%            | 50%             | 100%            | 50%             | 100%            | 50%              |
| PHBV (g/L) (R) | 0.296<br>±0.004 | 0.1304<br>±0.01 | 0.8182<br>±0.01 | 0.4058<br>±0.03 | 1.3922<br>±0.01 | 0.8242<br>±0.025 |
| HV(%)          | 14.6            | 17.9            | 2.9             | 4.1             | 1.9             | 1.4              |
| HB(%)          | 85.3            | 82.1            | 97.1            | 95.9            | 98.1            | 98.6             |

## Raw data

Calibration curves for shake flask experiment with methyl (R)-3-hydroxybutyrate and methyl (R)-3-hydroxyvalerate (from methanolysis of butyric and valeric acids) containing benzoic acid as an internal standard was constructed.

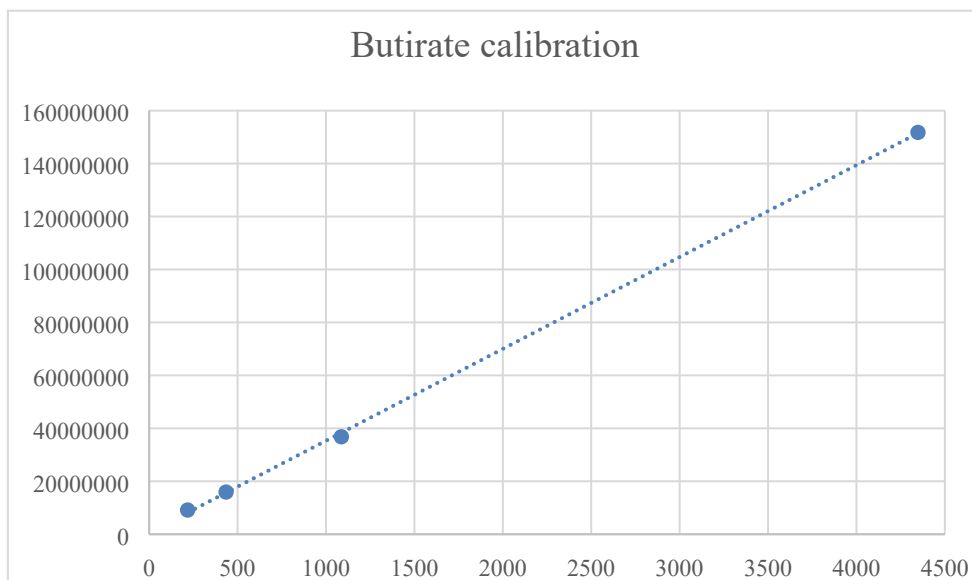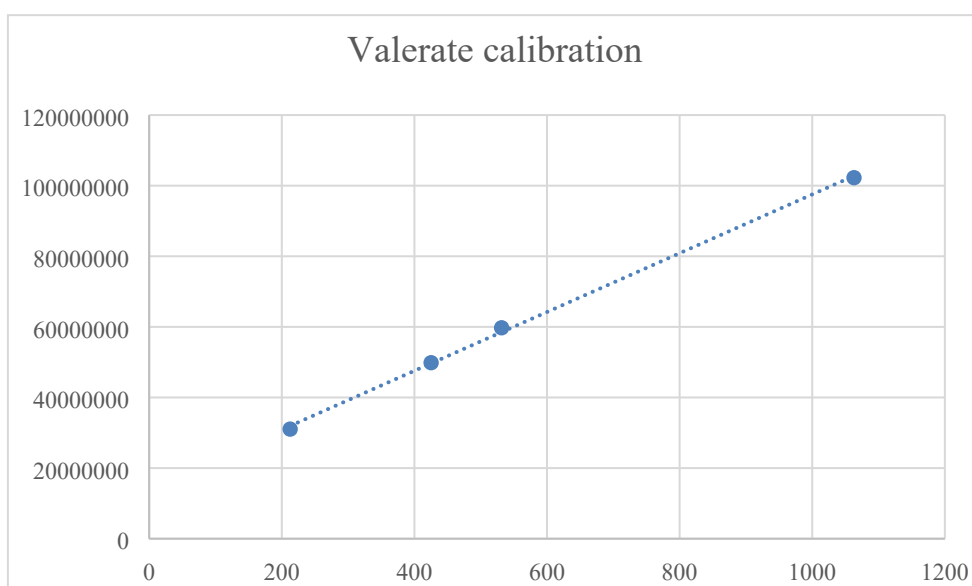

## Results from GC-MS

|              | WAF1     |          | WAF2      |          | WAF3      |           |
|--------------|----------|----------|-----------|----------|-----------|-----------|
| HV peak area | 28108663 | 12187305 | 12537277  | 8725971  | 13979077  | 5992282   |
| HB peak area | 44452384 | 19188968 | 138352648 | 68101791 | 237447381 | 141600291 |
| HV ppm       | 217      | 117      | 121       | 84       | 135       | 57        |
| HB ppm       | 1263     | 535      | 3970      | 1945     | 6826      | 4064      |
| Biomass (mg) | 58.9     | 33.7     | 63.5      | 36.4     | 175.10    | 76.9      |

|               |       |        |        |        |        |        |
|---------------|-------|--------|--------|--------|--------|--------|
| Sample (mL)   | 2     | 2      | 2      | 2      | 2      | 2      |
| (HV+HB) (g/L) | 0.296 | 0.1304 | 0.8182 | 0.4058 | 1.3922 | 0.8242 |

Data corresponding to **Figure 4** of the manuscript

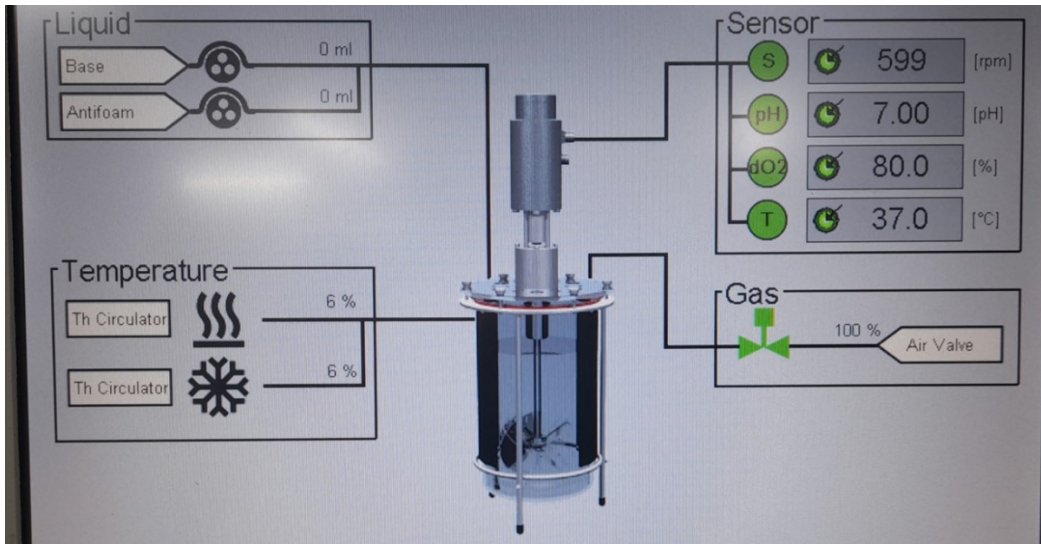

| measurements |          |
|--------------|----------|
| time (h)     | OD (abs) |
| 0            | 5,3      |
| 24           | 6,5      |
| 96           | 8,7      |
| 120          | 9,5      |
| 144          | 9,9      |

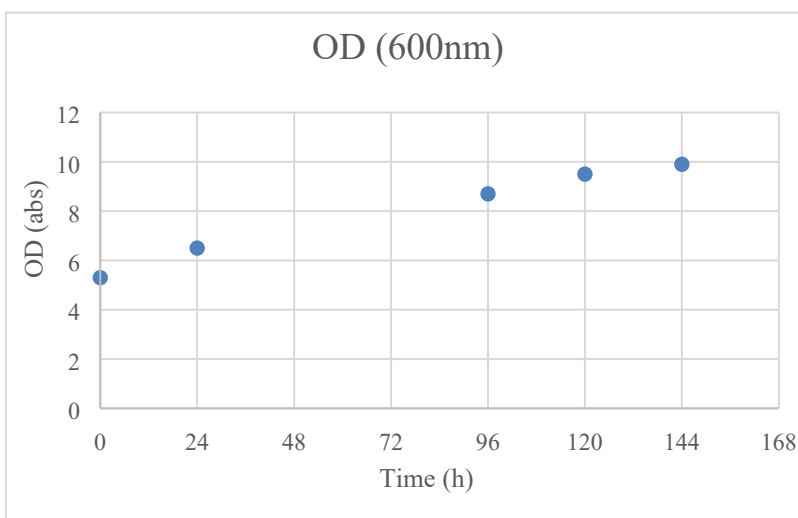

| time (h) | Dry Cell Weigth (g/L) | HV peak area | HB peak area | Total ppm | Biomass sample (mg) | Sample (mL) | (gPHA/gbiomass) | PHA accumulation(%) | (g biomass/L) | g/L PHA (bioreactor) |
|----------|-----------------------|--------------|--------------|-----------|---------------------|-------------|-----------------|---------------------|---------------|----------------------|
| 96       | 5,97                  | 99           | 8942         | 9040      | 59,7                | 2           | 0,3028          | 30,3                | 5,97          | 1,8080               |
| 120      | 5,49                  | 171          | 11976        | 12167     | 54,9                | 2           | 0,4432          | 44,3                | 5,49          | 2,4333               |
| 144      | 5,69                  | 148          | 10962        | 11111     | 56,9                | 2           | 0,3905          | 39,1                | 5,69          | 2,2221               |

Calibration curves for bioreactor experiments with methyl (R)-3-hydroxybutyrate and methyl (R)-3-hydroxyvalerate (from methanolysis of butyric and valeric acids) containing benzoic acid as an internal standard was constructed.

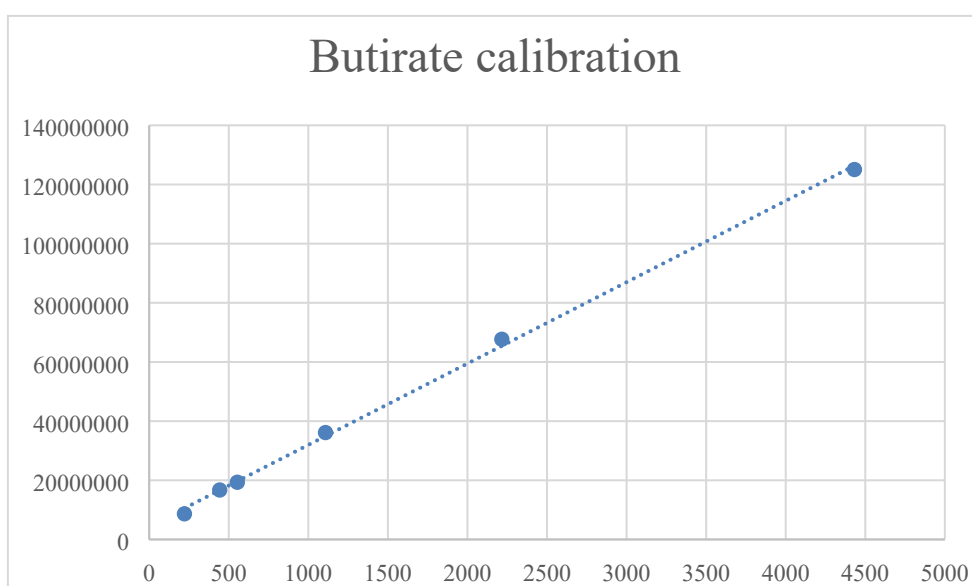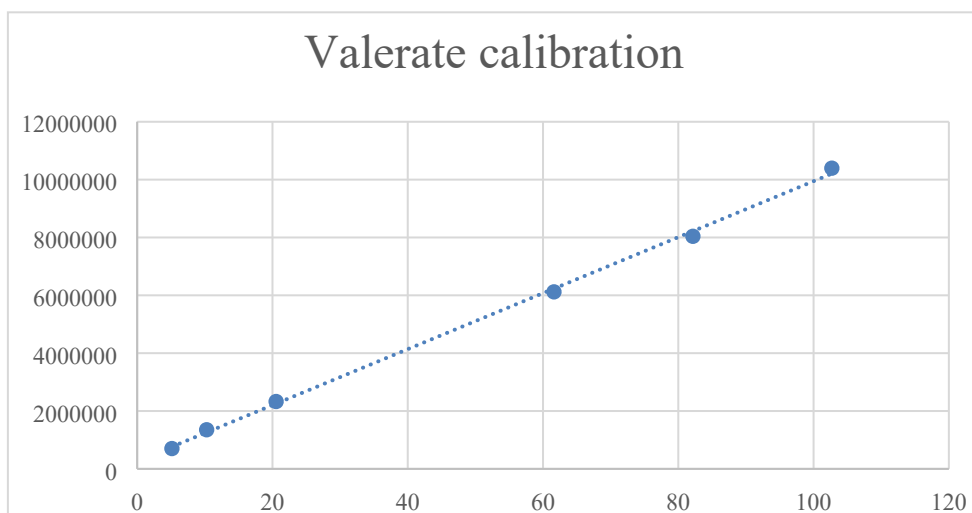

Supplement: d4fb00279b1.pdf [file d4fb00279b1.pdf]
